# Supplementary material for: Polyvinylidene fluoride (PVDF)/hydrophobic nano-silica (H-SiO2) coated superhydrophobic porous materials for water/oil separation
Source: Royal Society of Chemistry journal article supplement (doi:10.1039/c5ra17728f), 2016-01-01
Supplement: c5ra17728f4.pdf [file c5ra17728f4.pdf]

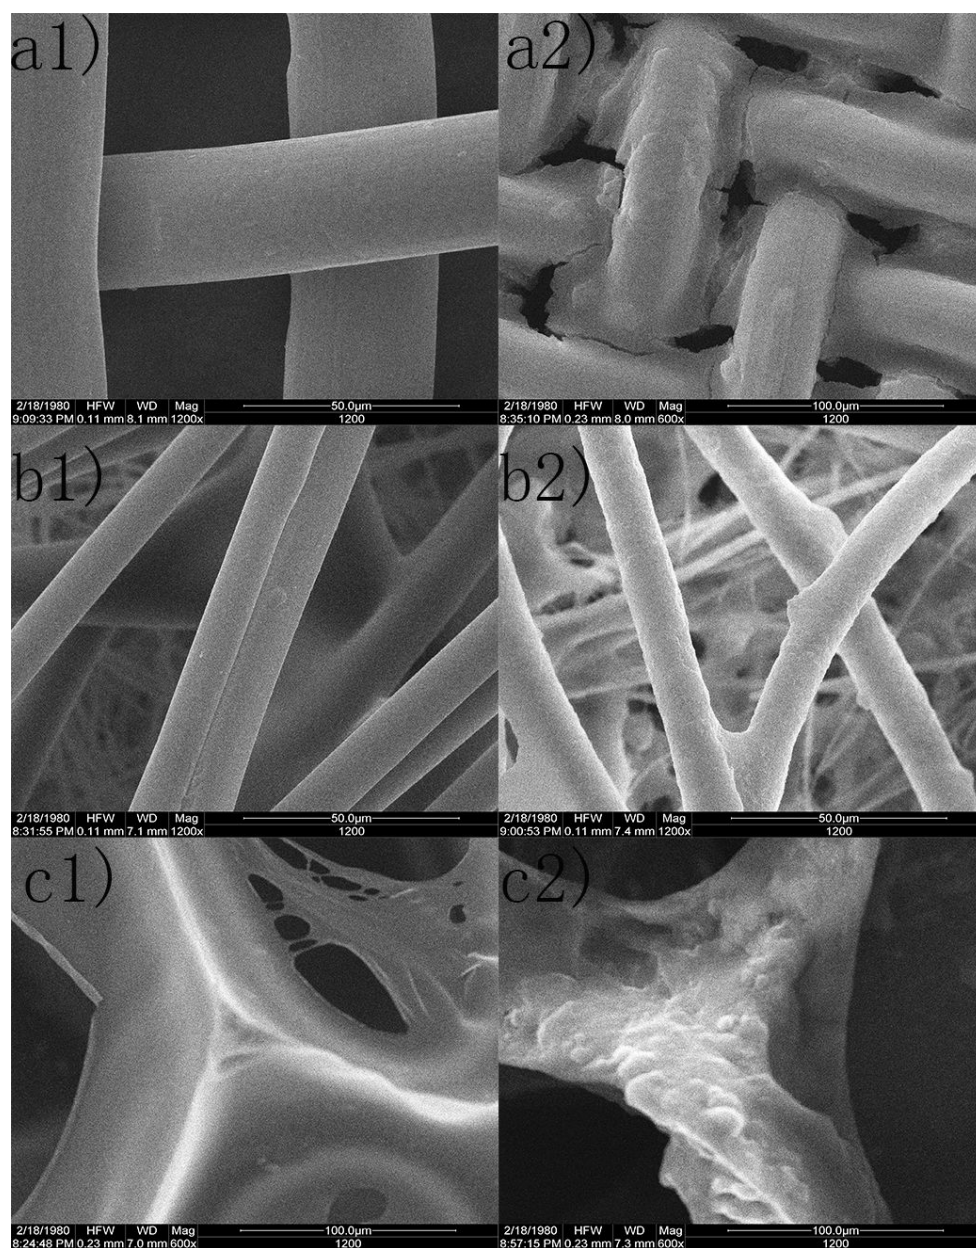

S4: Figures of original materials (copper mesh a1, filter paper b1, sponge c1), and coatings after water jetting tests (copper mesh a2, filter paper b2, sponge c2).
